# Supplementary material
Source: PubMed Central journal article supplement (PMC3208611)
Supplement: supp_45_4_843__1.pdf [file supp_45_4_843__1.pdf]

## Online Data Supplement

### ICOS Controls T Cell Migration to the Lungs via Down-Regulation of CCR7 and CD62L

Tamson V. Moore, Bryan S. Clay, Judy L. Cannon, Alexander Histed, Rebecca A. Shilling, and Anne I. Sperling

#### Figure Legend

**Figure E1: FTY720 treatment sequestered cells in the lymph nodes while Mel-14 treatment blocked lymph node entry.** **A.** (*Left & Middle*) The total number of lymph node and spleen cells was quantified and compared in untreated, FTY720-treated and Mel-14-treated mice after adoptive transfer and immunization as described in Figure 3. (*Right*) The percent of antigen-specific CD4 cells was assessed by flow cytometry in the blood. **B.** The total number of CD4 T cells in the draining lymph nodes and spleens of B6 and ICOS<sup>-/-</sup> mice sensitized and challenged with or without Mel-14 treatment as described in Figure 6 were assessed by flow cytometry and quantified.

**Figure E2: More activated ICOS<sup>-/-</sup> CD4 T cells are CD62L<sup>high</sup> than wild-type cells throughout the immune response.** **A.** Wild-type hosts were given wild-type (solid lines, closed squares) or ICOS<sup>-/-</sup> DO11.10 (dotted lines, open triangles) cells and immunized as described in Figure 2. Between day 0 and day 13, CD62L expression was assessed by flow cytometry on the wild-type and ICOS<sup>-/-</sup> KJ1-26<sup>+</sup>CD4<sup>+</sup> T cells and the percent of antigen-specific cells expressing CD62L at each time-point is shown. **B.** Percent CD62L<sup>high</sup> (*left*) and MFI of CCR7 (*right*) expression at each cell division of DO11.10 (solid lines, closed squares) or ICOS<sup>-/-</sup> DO11.10 (dotted lines, open triangles) cells activated *in vitro*. *In vitro* results have been replicated two independent times with n ≥ 3 for each experiment.
