# Supplementary material
Source: PubMed Central journal article supplement (PMC3208611)

## A. Adoptive transfer model

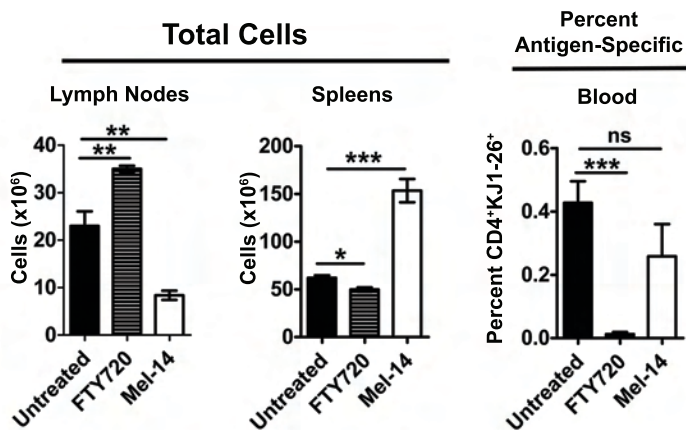

## B. CD4<sup>+</sup> T cells in airway inflammation model

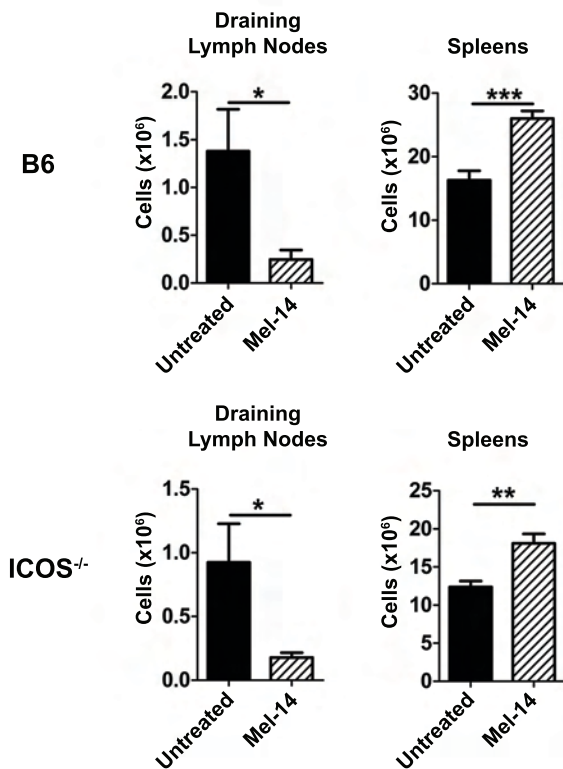

## A. Expression of CD62L over time

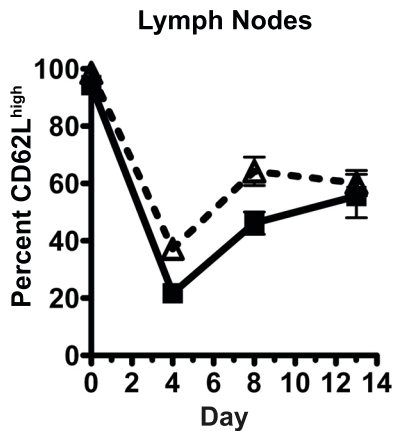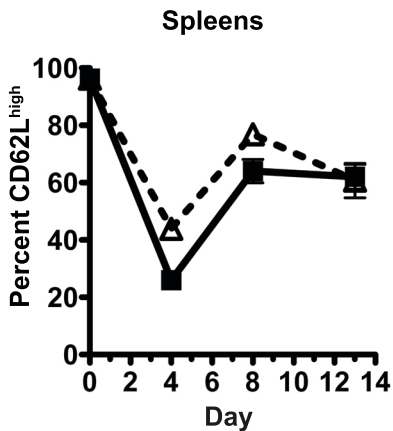

## B. Down-regulation of CCR7 and CD62L *in vitro*

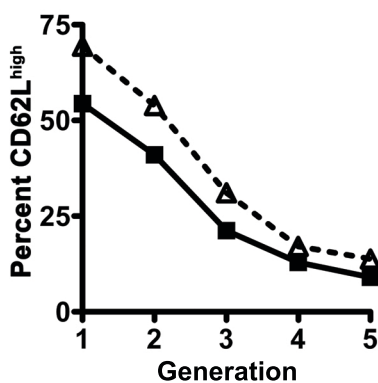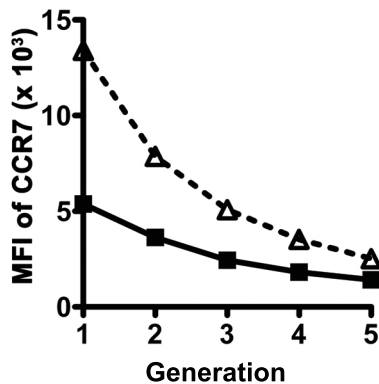

Supplement: supp_45_4_843__2.pdf [file supp_45_4_843__2.pdf]
